# Supplementary material for: Quantified Vascular Calcification at the Dialysis Access Site: Correlations with the Coronary Artery Calcium Score and Survival Analysis of Access and Cardiovascular Outcomes
Source: MDPI journal article supplement (doi:10.3390/jcm9051558), 2020-05-21

## Supplementary Material

**Supplementary Figure 1.** Flow chart of the subjects

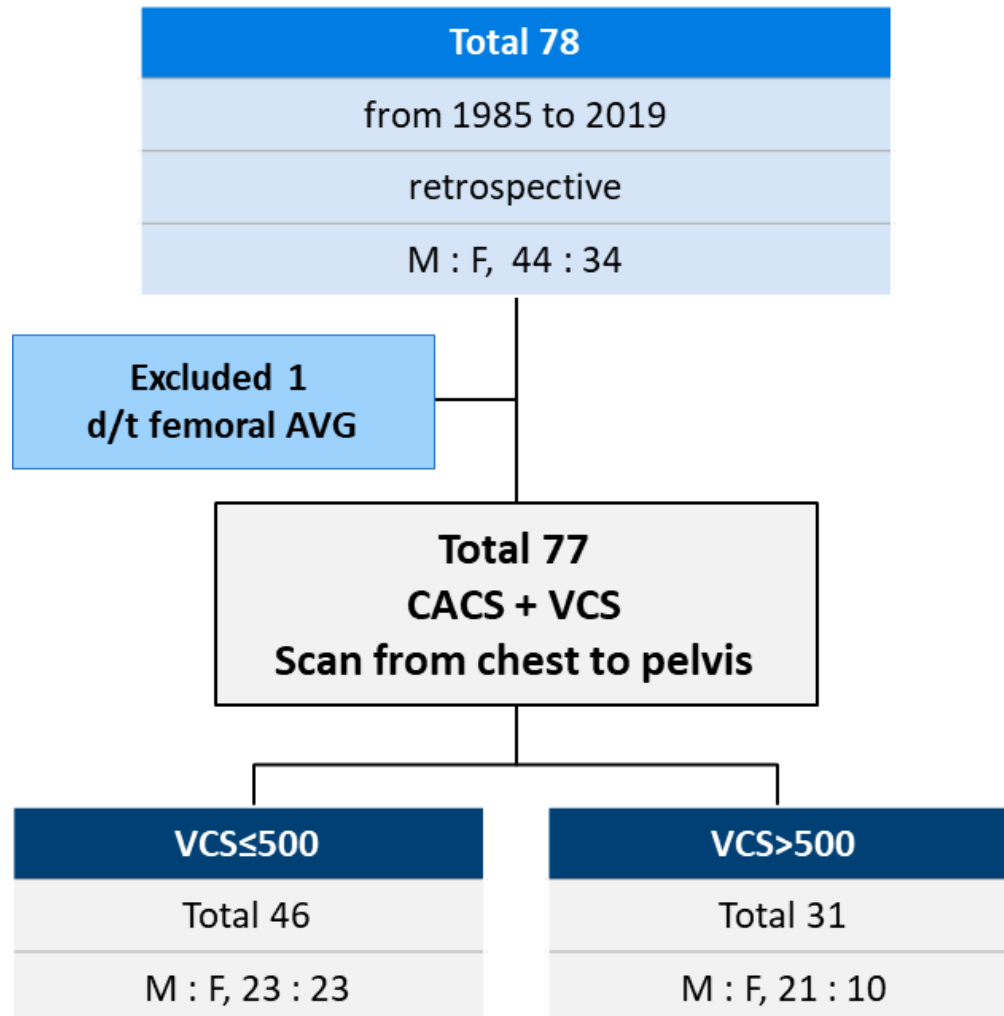

**Supplementary Figure 2.** The distribution of magnesium in our study

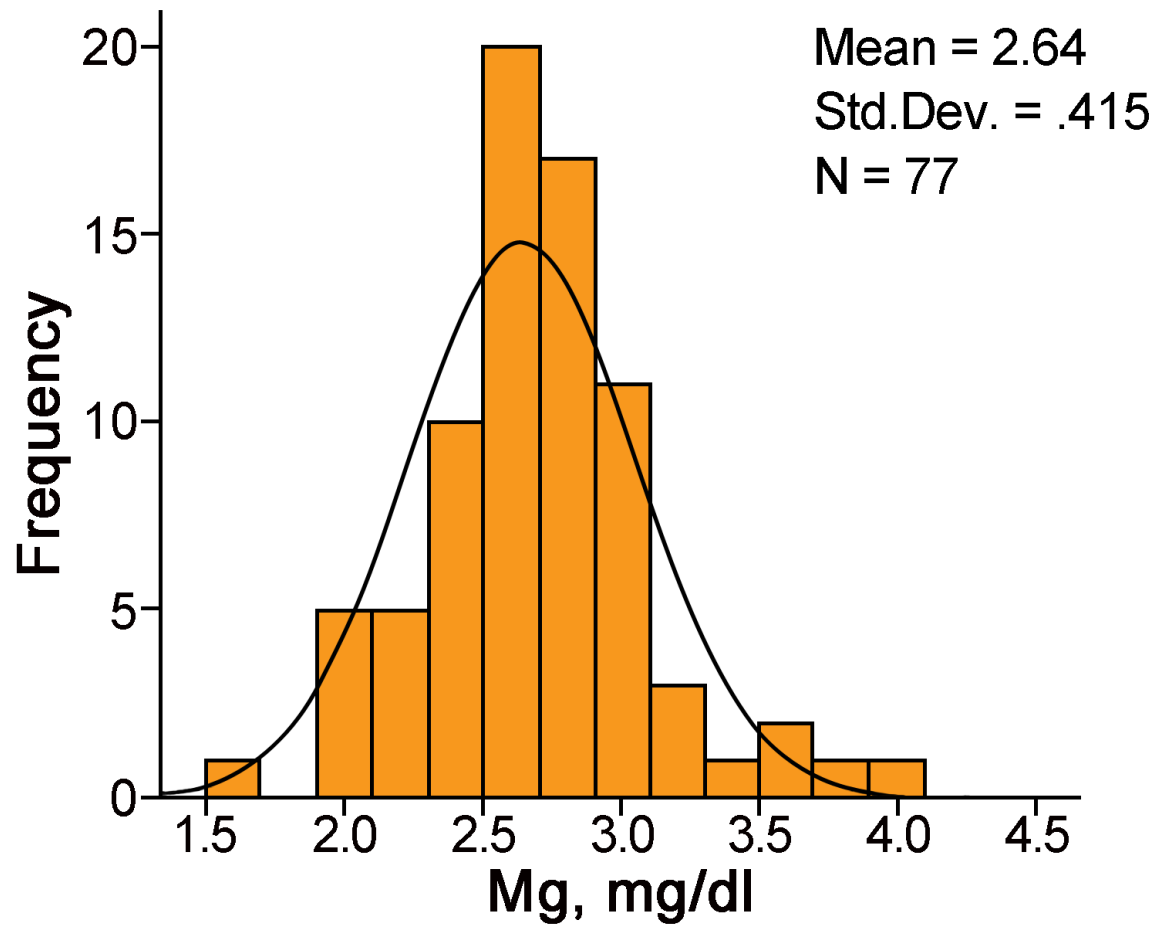

Supplement: s1 [file s1]
